# Supplementary material for: Role of Interaction and Nucleoside Diphosphate Kinase B in Regulation of the Cystic Fibrosis Transmembrane Conductance Regulator Function by cAMP-Dependent Protein Kinase A
Source: PubMed Central journal article supplement (PMC4780765; doi:10.1371/journal.pone.0149097), 2016-03-07
Supplement: pone.0149097.s001.pdf [file pone.0149097.s001.pdf]

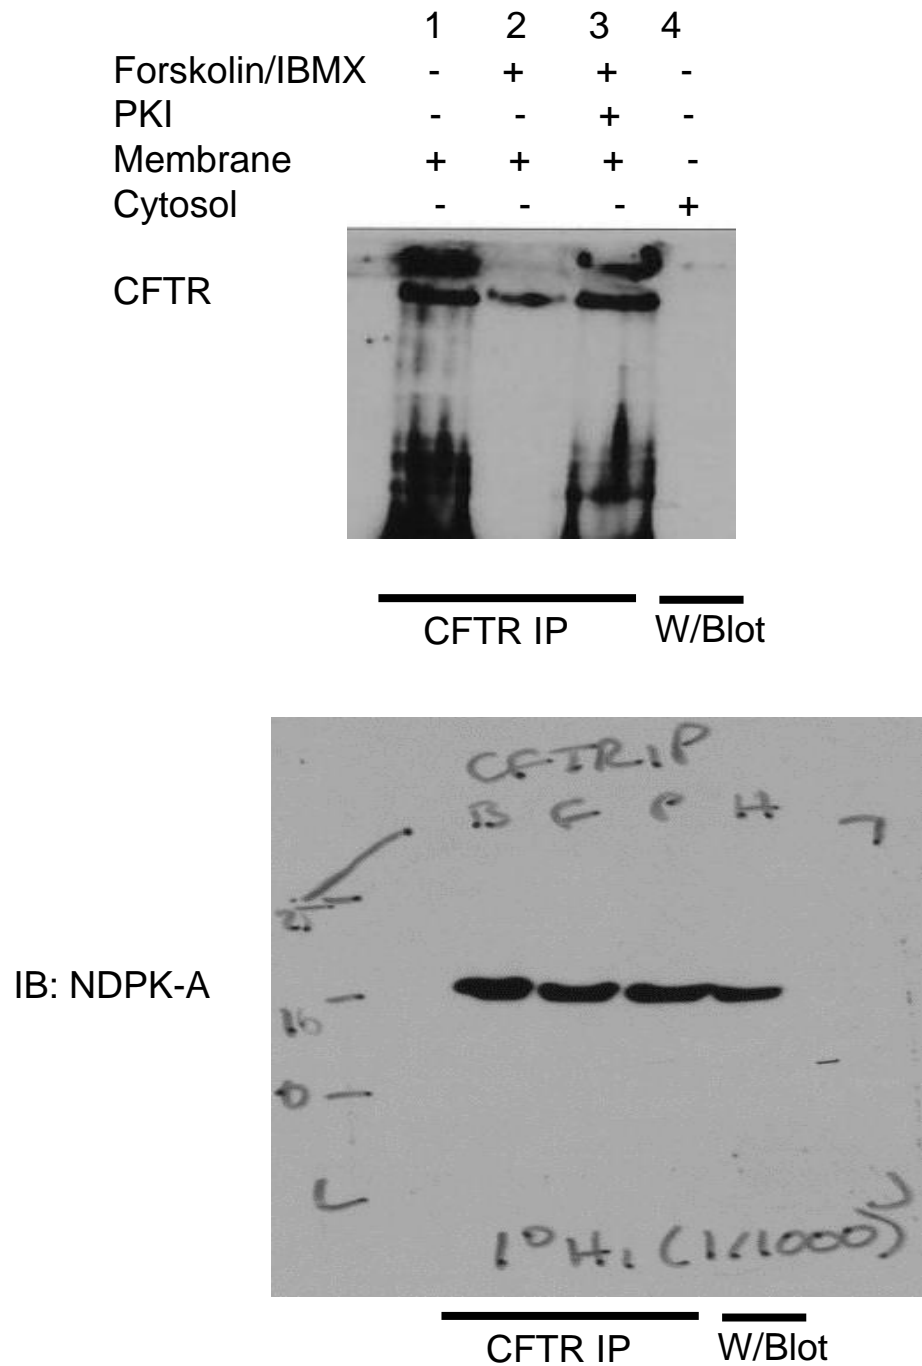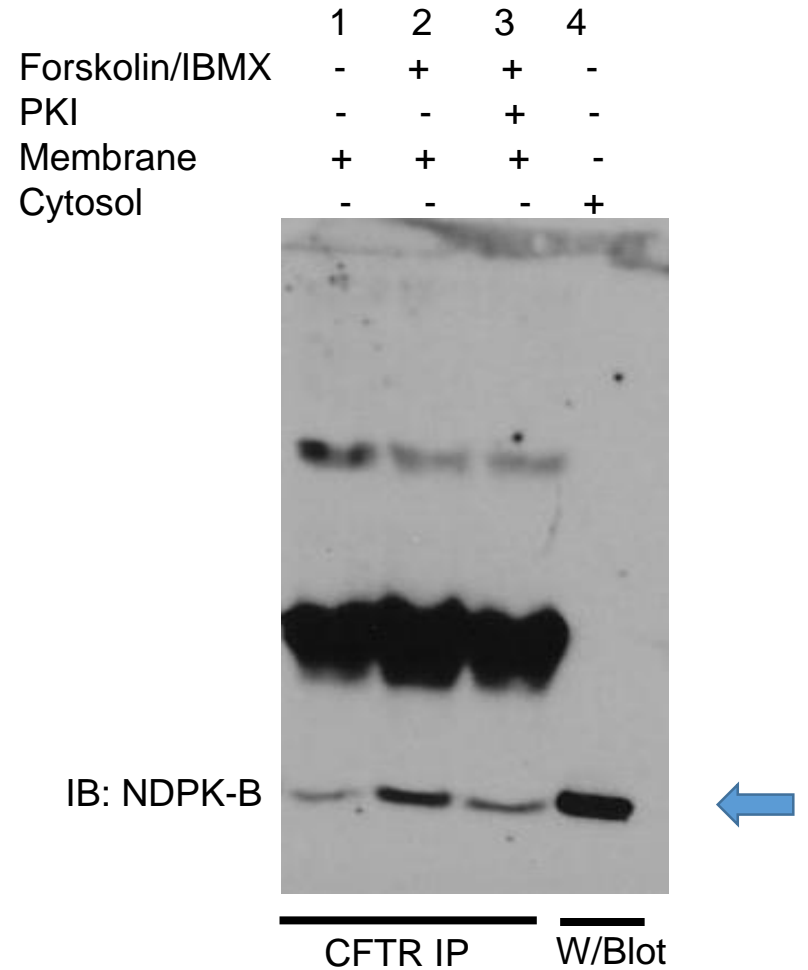

**Figure 3a**

Images of whole blots from which cut-outs (arrows) in figure 3a were made

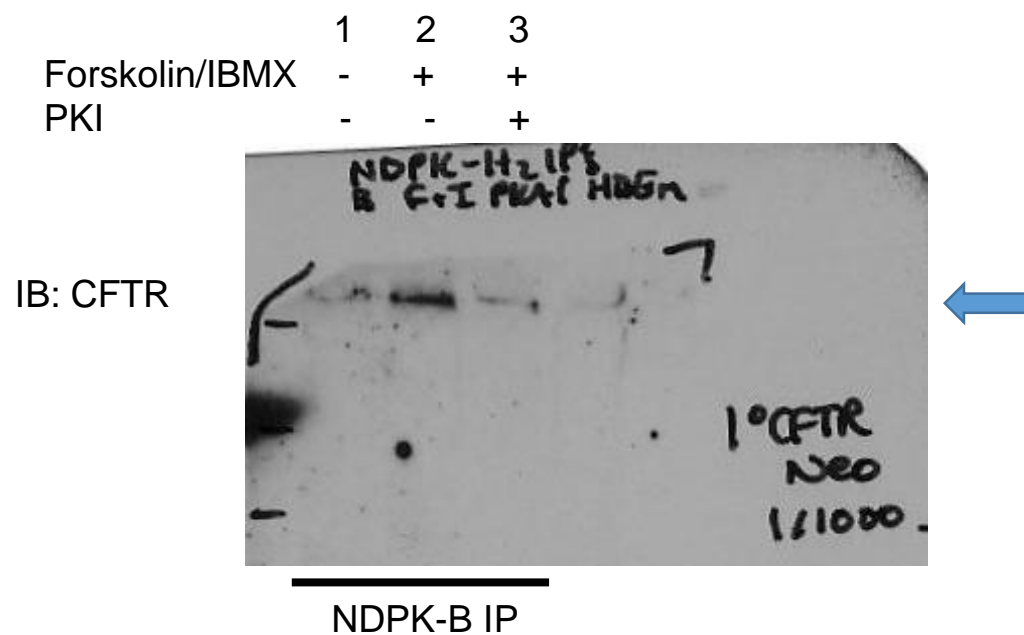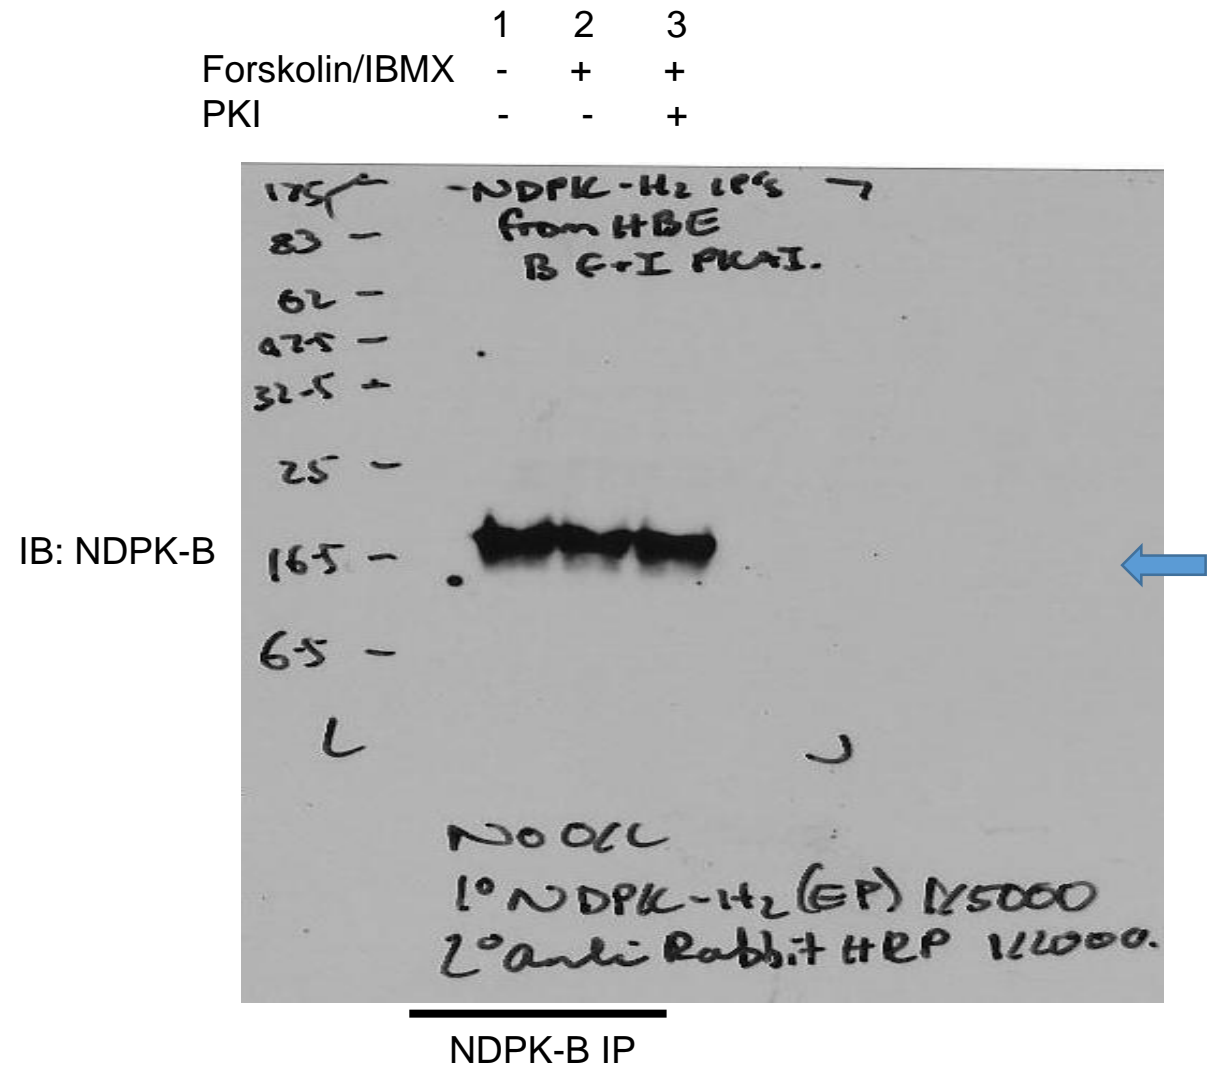

### Figure 3c

Images of whole blots from which cut-outs (arrows) in figure 3c were made

**a**

|         |        | 1 | 2 | 3 | 4 | 5 | 6 |
|---------|--------|---|---|---|---|---|---|
| NDPK-B  | 36-54  | - | - | + | + | - | - |
| NDPK-A  | 36-54  | - | - | - | - | + | + |
| CFTR IP | Pellet | + | - | + | - | + | - |
| CFTR IP | Sup'nt | - | + | - | + | - | + |

IB: CFTR

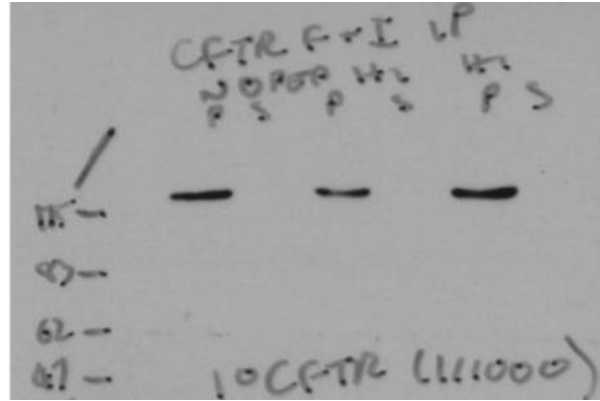

IB: NDPK-B

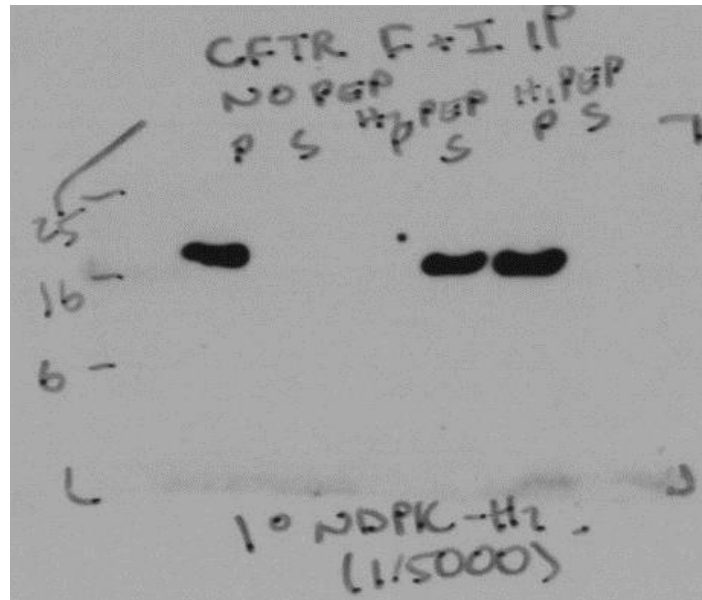

CFTR IP

**Figure 4a**

Images of whole blots from which cut-outs (arrows) in figure 4a were made

**b**

|                  | 1 | 2 | 3 | 4 | 5 | 6 |
|------------------|---|---|---|---|---|---|
| NDPK-B 36-54     | - | - | + | + | - | - |
| NDPK-A 36-54     | - | - | - | - | + | + |
| NDPK-B IP Pellet | + | - | + | - | + | - |
| NDPK-B IP Sup'nt | - | + | - | + | - | + |

IB: CFTR

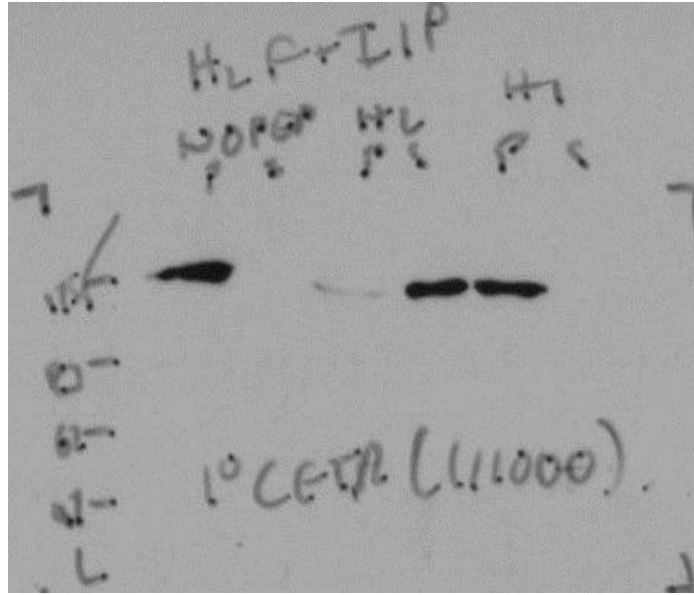

IB: NDPK-B

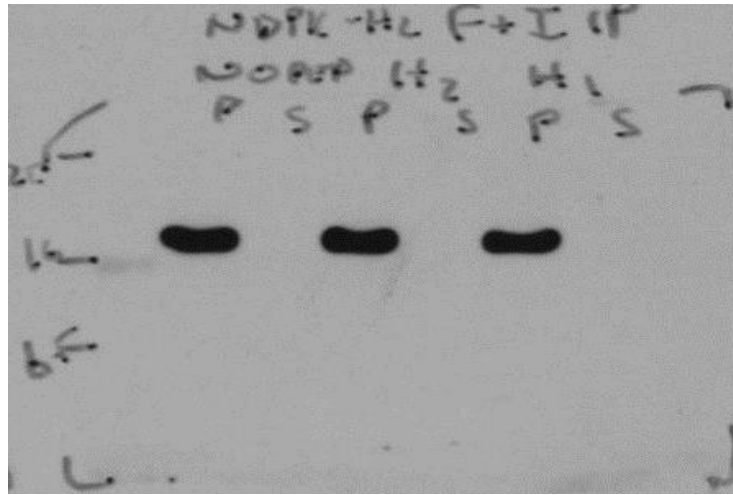

NDPK-B IP

**Figure 4b** Images of whole blots from which cut-outs (arrows) in figure 4b were made

**a**

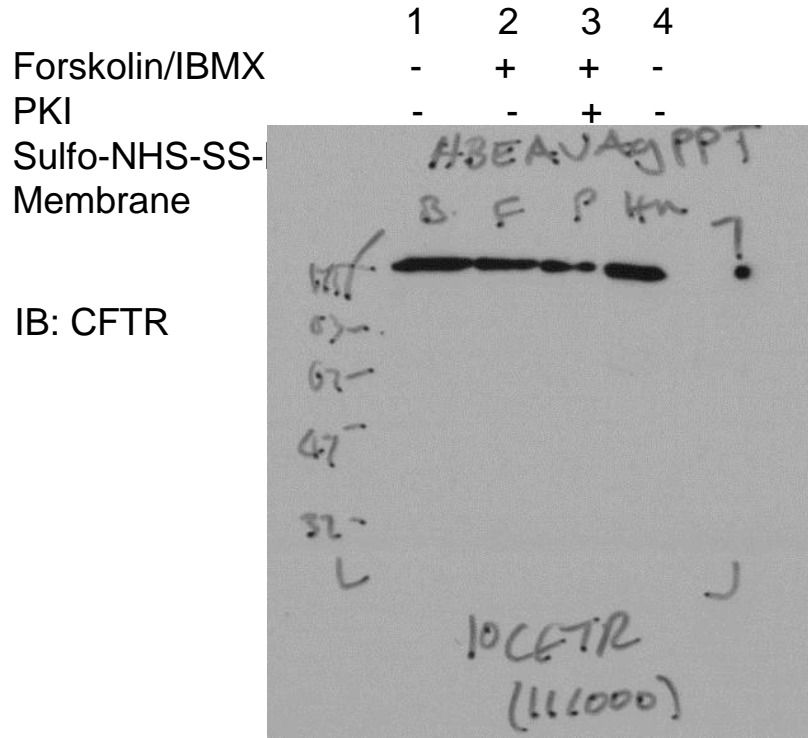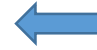

**Figure 5a - Image of whole blots from which cut-out (arrows) in figure 5a were made**

**Figure 5b - Images of whole blots from which cut-outs (arrows) in figure 5b were made**

|                     | 1 | 2 | 3 | 4 |
|---------------------|---|---|---|---|
| Forskolin/IBMX      | - | + | + | - |
| PKI                 | - | - | + | - |
| Sulfo-NHS-SS-Biotin | + | + | + | - |
| Cytosol             | - | - | - | + |

|                     | 1 | 2 | 3 | 4 |
|---------------------|---|---|---|---|
| Forskolin/IBMX      | - | + | + | - |
| PKI                 | - | - | + | - |
| Sulfo-NHS-SS-Biotin | + | + | + | - |
| Cytosol             | - | - | - | + |

IB: CFTR

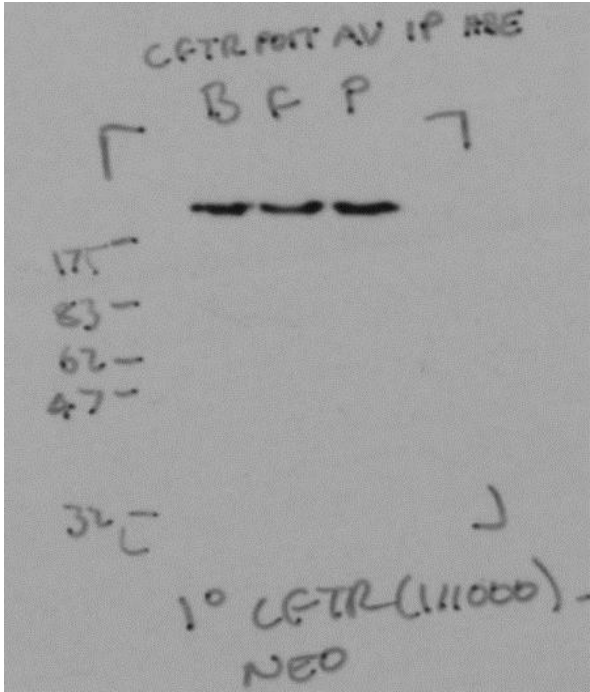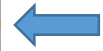

CFTR IP W/Blot  
(Post-avidin  
agarose precipitate)

IB: NDPK-B

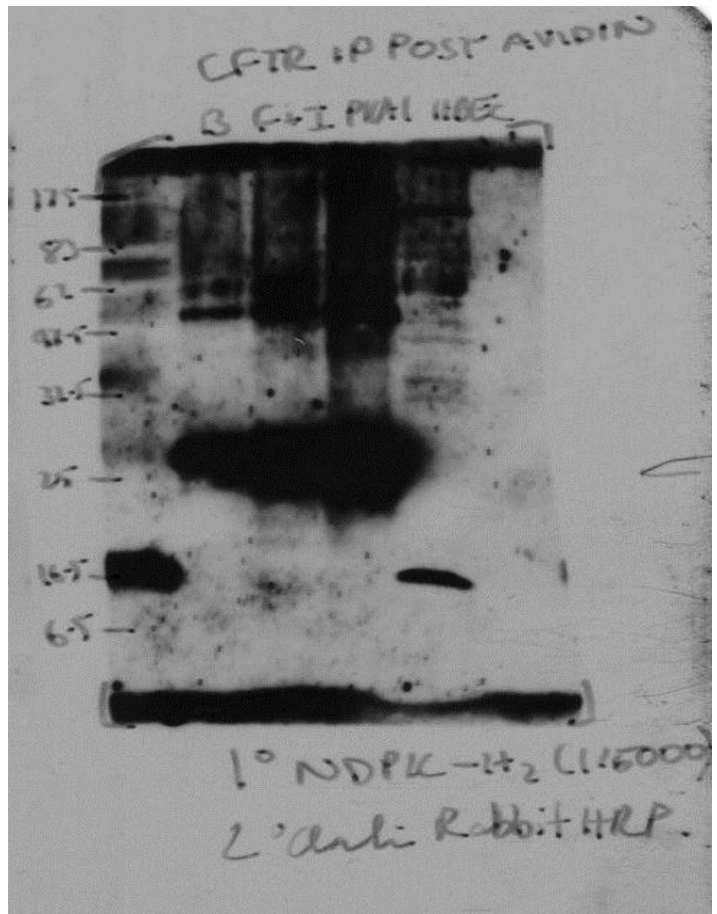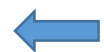

CFTR IP W/Blot  
(Post-avidin  
agarose precipitate)

Figure 5c - Images of whole blots from which cut-outs (arrows) in figure 5c were made

|                     | 1 | 2 | 3 | 4 |
|---------------------|---|---|---|---|
| Forskolin/IBMX      | - | + | + | - |
| PKI                 | - | - | + | - |
| Sulfo-NHS-SS-Biotin | + | + | + | - |
| Membrane            | - | - | - | + |

|                     | 1 | 2 | 3 | 4 |
|---------------------|---|---|---|---|
| Forskolin/IBMX      | - | + | + | - |
| PKI                 | - | - | + | - |
| Sulfo-NHS-SS-Biotin | + | + | + | - |
| Membrane            | - | - | - | + |

IB:CFTR

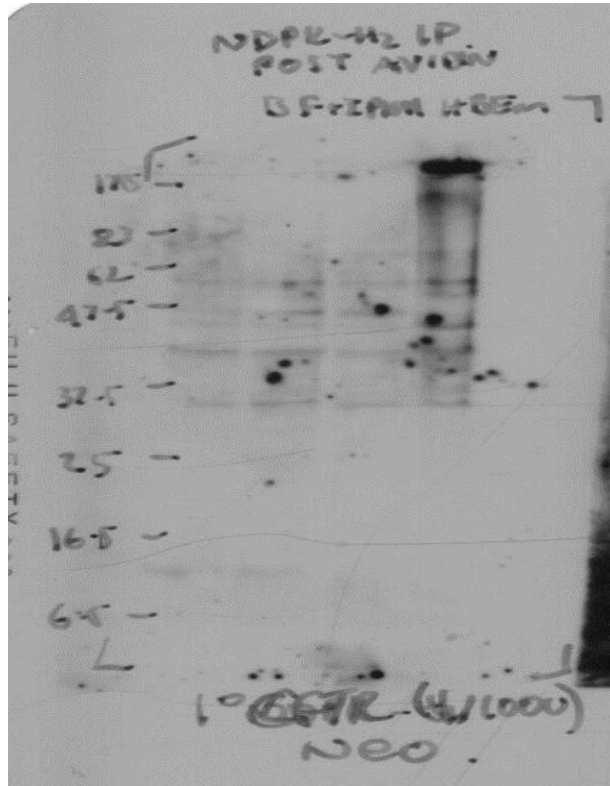

NDPK-B IP W/Blot  
(Post-avidin  
agarose precipitate)

IB: NDPK-B

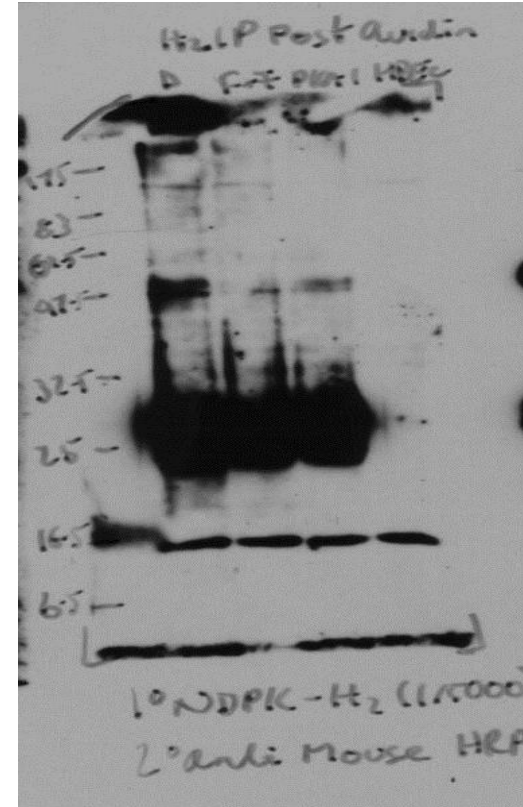

NDPK-B IP W/Blot  
(Post-avidin  
agarose precipitate)
